# Supplementary material
Source: HighWire-hosted journal article supplement (https://embomolmed.embopress.org/content/emmm.201607204/F9)

**Figure 6**

**Figure 6A**

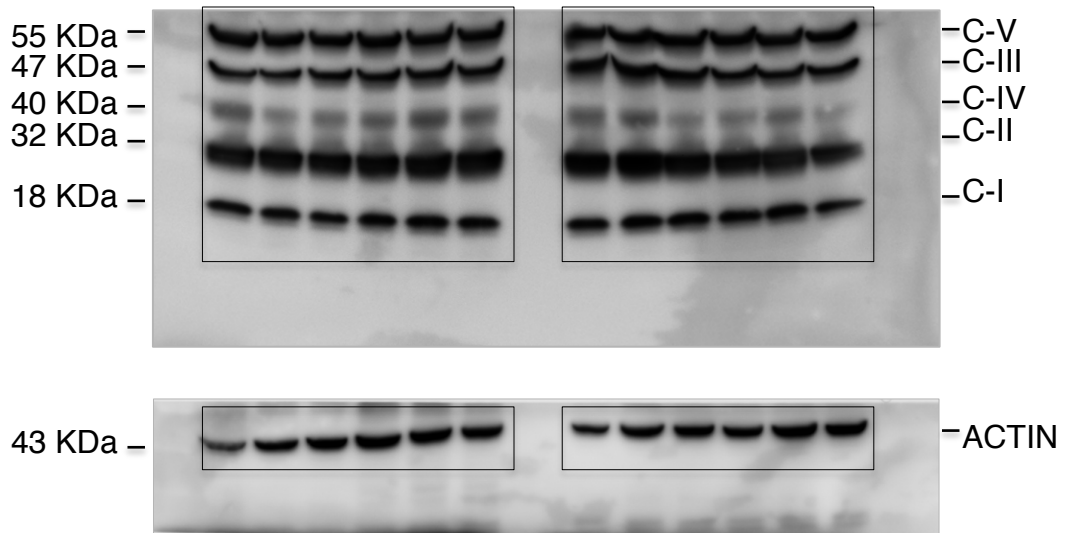

Supplement: inline-supplementary-material-2 [file inline-supplementary-material-2.pdf]
